# Supplementary material for: Genetic Diversity, Population Structure, and Botanical Variety of 320 Global Peanut Accessions Revealed Through Tunable Genotyping-by-Sequencing
Source: PubMed Central journal article supplement (PMC6162295; doi:10.1038/s41598-018-32800-9), 2018-09-28
Supplement: 41598_2018_32800_MOESM1_ESM.pdf [file 41598_2018_32800_MOESM1_ESM.pdf]

**Genetic Diversity, Population Structure, and Botanical Variety of 320 Global Peanut Accessions Revealed Through Tunable Genotyping-by-Sequencing**

**Zheng Zheng<sup>1#</sup>, Ziqi Sun<sup>1#</sup>, Yuanjin Fang<sup>1</sup>, Feiyan Qi<sup>1</sup>, Hua Liu<sup>1</sup>, Lijuan Miao<sup>1</sup>,  
Pei Du<sup>1</sup>, Lei Shi<sup>1</sup>, Wei Gao<sup>1</sup>, Suoyi Han<sup>1</sup>, Wenzhao Dong<sup>1</sup>, Fengshou Tang<sup>1</sup>, Feng  
Cheng<sup>2</sup>, Haiyan Hu<sup>1</sup>, Bingyan Huang<sup>1\*</sup>, Xinyou Zhang<sup>1\*</sup>**

<sup>1</sup>Industrial Crops Research Institute, Henan Academy of Agricultural Sciences / Key  
Laboratory of Oil Crops in Huanghuaihai Plains, Ministry of Agriculture / Henan Provincial  
Key Laboratory for Genetic Improvement of Oil Crops, Zhengzhou, 450002, China;

<sup>2</sup>Institute of Vegetables and Flowers, Chinese Academy of Agricultural Science, Beijing,  
100081, China

**Corresponding authors: Xinyou Zhang and Bingyan Huang**

**Address: No. 116 Huayuan Road, Jinshui District, Zhengzhou 450002, China**

**Telephone numbers: +86 0371-65729560, +86 0371-65718247**

**Fax numbers: +86 0371-65739143**

**Email: [haasz@126.com](mailto:haasz@126.com), [huangbingyan@alivun.com](mailto:huangbingyan@alivun.com)**

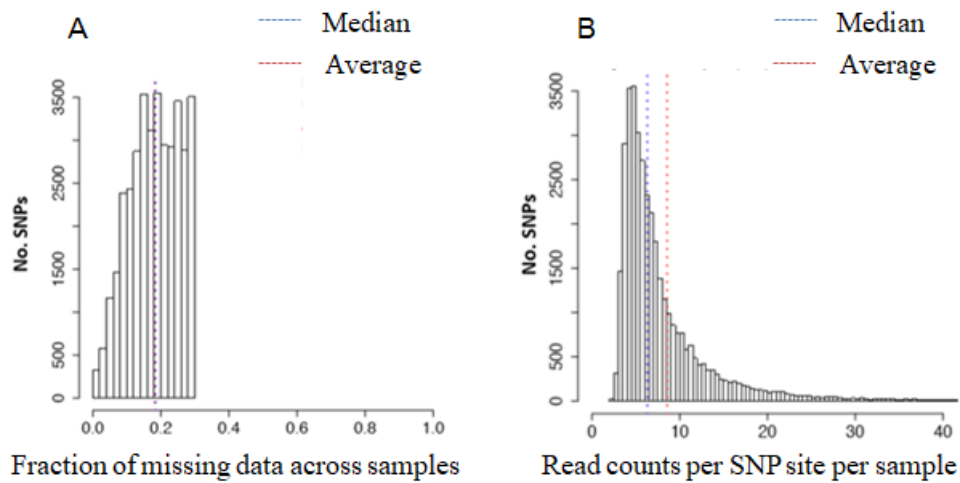

**Supplementary Figure 1** Histograms of average missing data rate and average number of reads per SNP site

(A) Histogram of average missing data rate of the 37,128 SNPs across 320 peanut samples. The average missing data rate is 18.1% and the median is 18.4%. (B) Histogram of read counts of 37,128 SNP sites for each peanut accession. On average, each SNP call in each sample was supported by 9 reads and the median is 6 reads per SNP site per sample.

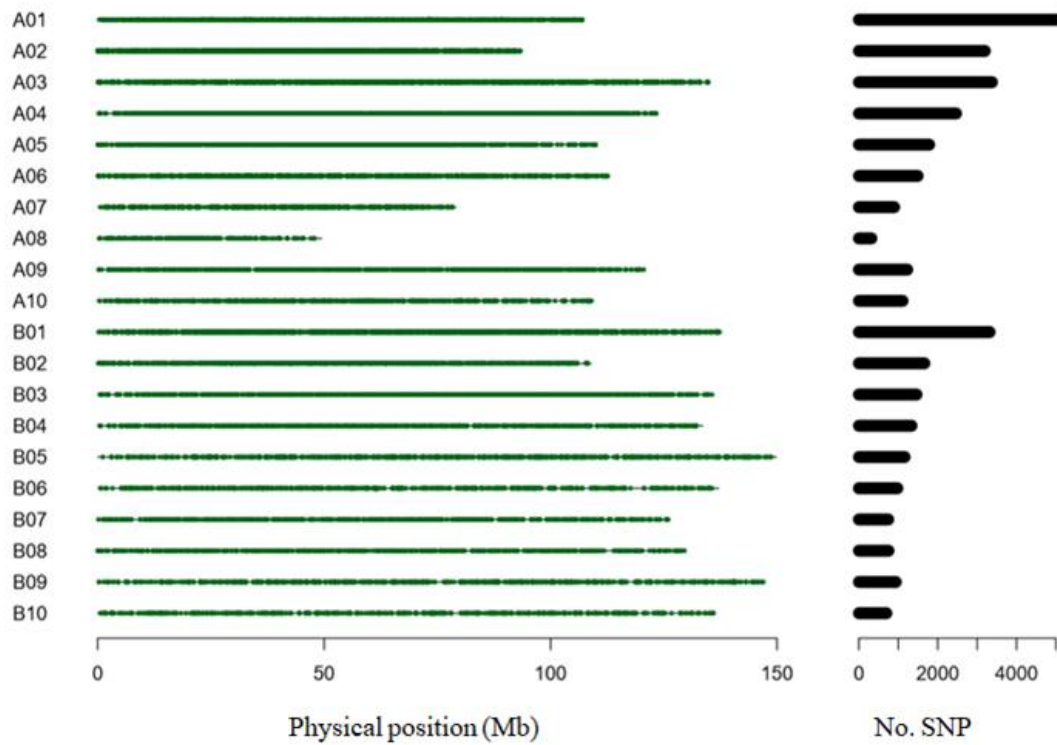

**Supplementary Figure 2** Distribution of 33,997 SNPs and the number on each chromosome

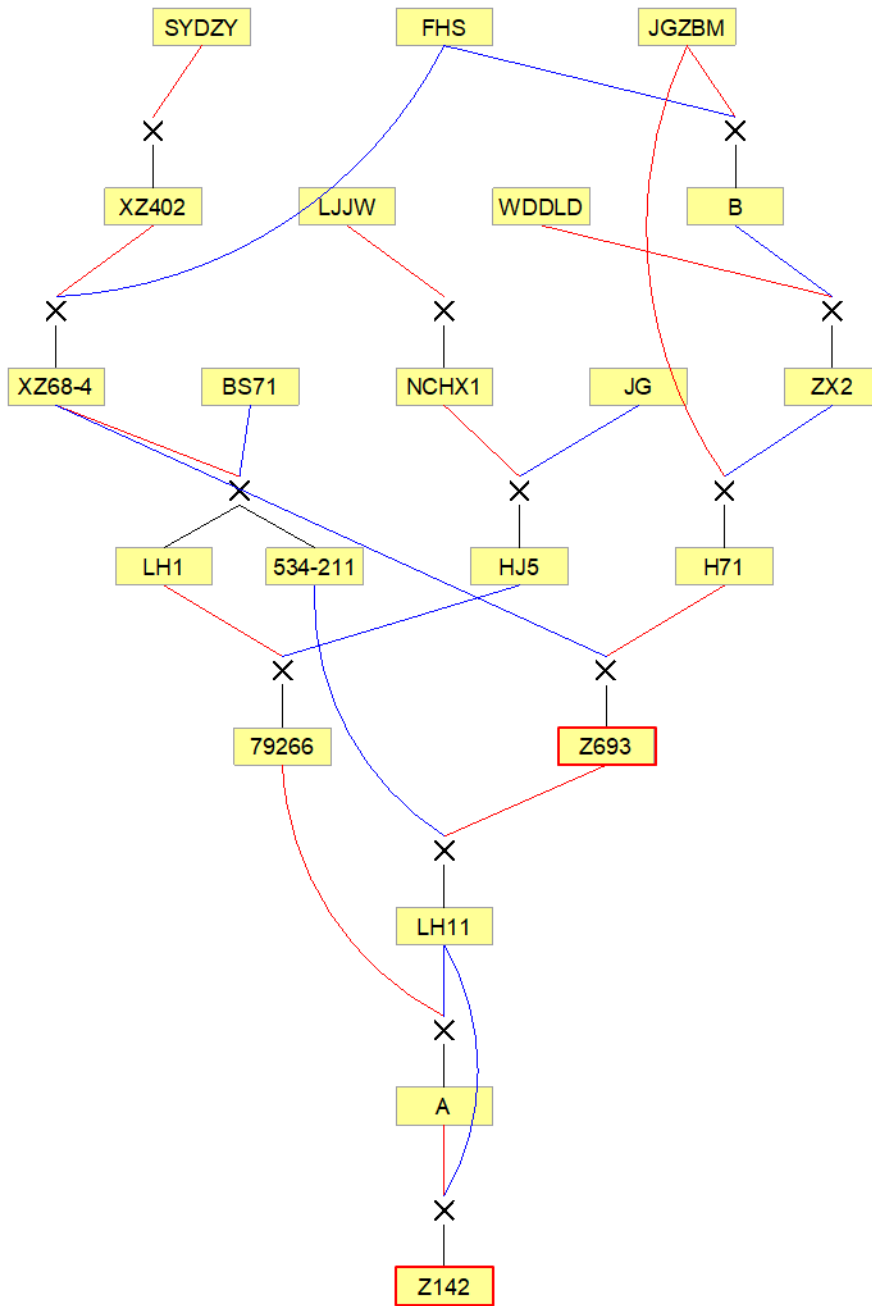

**Supplementary Figure 3** Pedigree information of peanut accessions Z142 and Z693

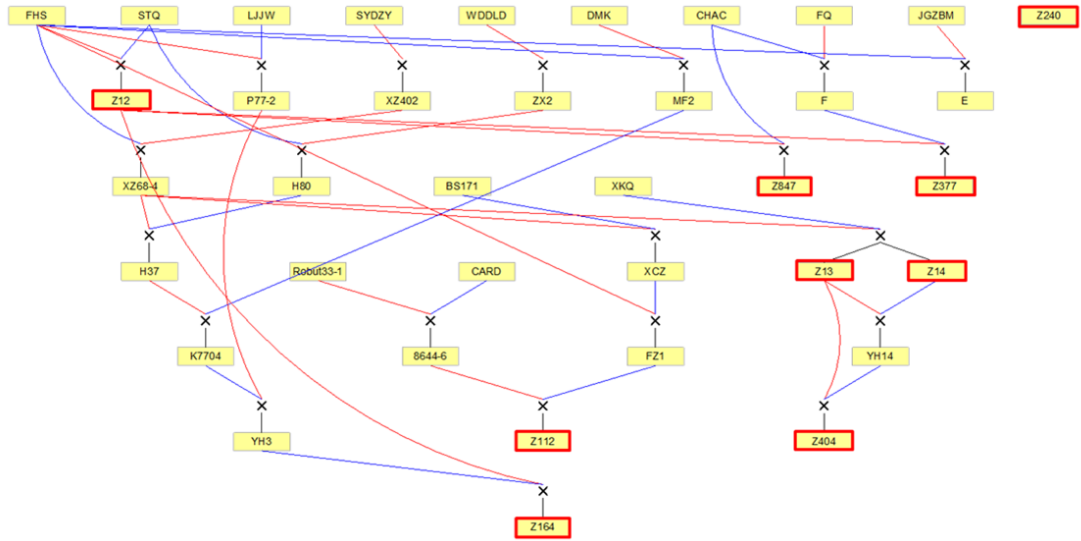

**Supplementary Figure 4** Pedigree information of 9 peanut accessions (Z112, Z377, Z240, Z164, Z14, Z12, Z847, Z13 and Z404)

**Supplementary Table S1** Distribution and density of SNPs identified by tGBS in this study

| Chromosome | SNP numbers | Chromosome size (bp)* | SNP density (per 100kb) |
|------------|-------------|-----------------------|-------------------------|
| Aradu.A01  | 5,119       | 106,015,837           | 4.83                    |
| Aradu.A02  | 3,195       | 92,627,924            | 3.45                    |
| Aradu.A03  | 3,376       | 133,136,946           | 2.54                    |
| Aradu.A04  | 2,465       | 121,180,382           | 2.03                    |
| Aradu.A05  | 1,781       | 108,284,737           | 1.64                    |
| Aradu.A06  | 1,490       | 110,733,117           | 1.35                    |
| Aradu.A07  | 894         | 77,948,624            | 1.15                    |
| Aradu.A08  | 315         | 48,937,534            | 0.64                    |
| Aradu.A09  | 1,225       | 118,999,574           | 1.03                    |
| Aradu.A10  | 1,107       | 107,255,536           | 1.03                    |
| Araip.B01  | 3,317       | 136,910,013           | 2.42                    |
| Araip.B02  | 1,660       | 108,641,379           | 1.53                    |
| Araip.B03  | 1,460       | 135,595,063           | 1.08                    |
| Araip.B04  | 1,333       | 133,209,281           | 1.00                    |
| Araip.B05  | 1,158       | 149,435,236           | 0.77                    |
| Araip.B06  | 976         | 136,721,448           | 0.71                    |
| Araip.B07  | 743         | 125,994,751           | 0.59                    |
| Araip.B08  | 750         | 129,151,520           | 0.58                    |
| Araip.B09  | 936         | 146,495,397           | 0.64                    |
| Araip.B10  | 697         | 135,809,342           | 0.51                    |
| Total      | 33,997      | 2,363,083,641         | 1.44                    |

\*Chromosome size was obtained from: Nature Genetics,(2016).48(4), 438-446. DOI: 10.1038/ng.3517

**Supplementary Table S2** Distance matrix for genotypes of the Reference set using polymorphic SNP markers

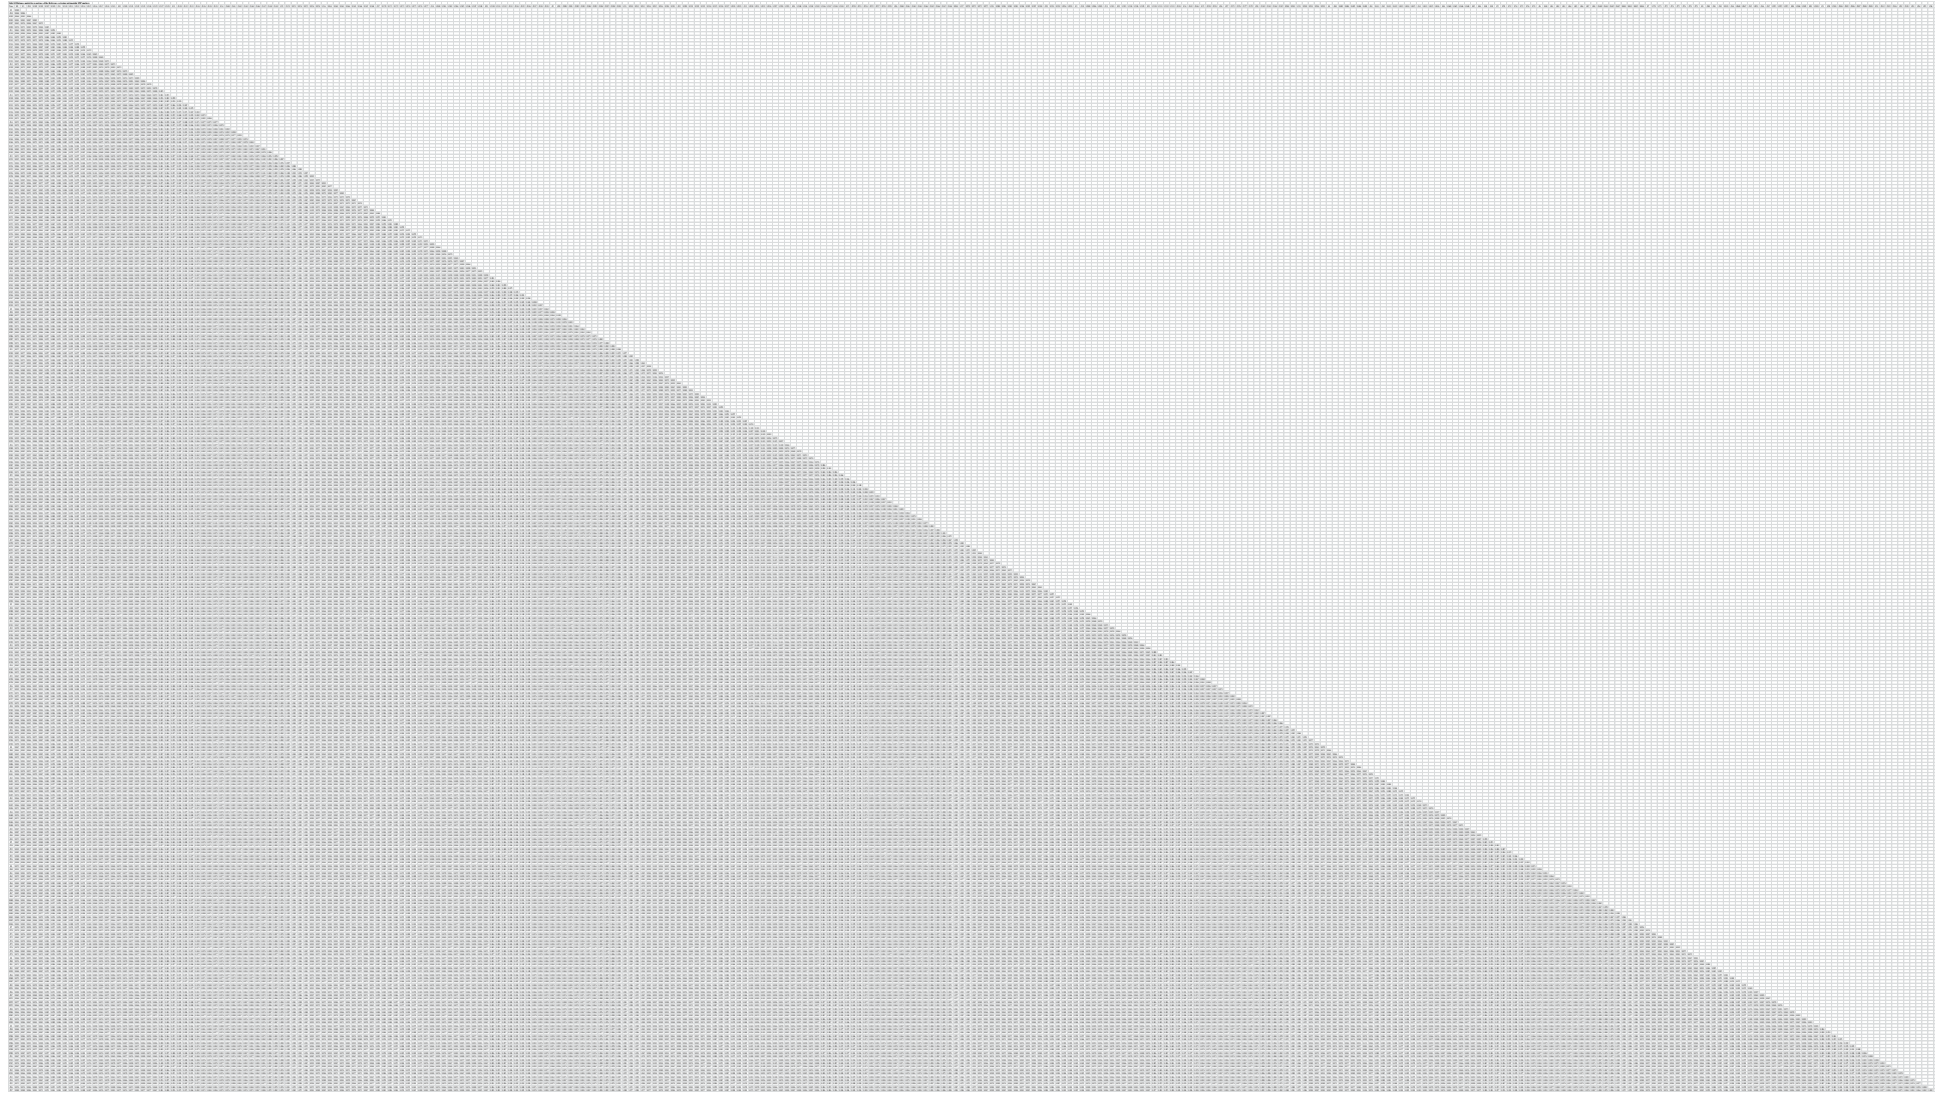

**Supplementary Table S3** The details of 320 peanut accessions used in genetic analysis

| Accession | Type          | Country | Clusters in Phylogenetic Tree | Structure_K=2 | Structure_K=3 | Botainical variety after checked |
|-----------|---------------|---------|-------------------------------|---------------|---------------|----------------------------------|
| Z0        | Landrace      | China   | C3                            | G2            | G3            | var. hypogaea <sup>3</sup>       |
| Z1        | Landrace      | China   | C2                            | G1            | G1            | var. vulgaris                    |
| Z2        | Landrace      | China   | C3                            | G2            | G3            | var. hypogaea                    |
| Z3        | Landrace      | China   | C3                            | G2            | G3            | var. hypogaea                    |
| Z4        | Landrace      | China   | C3                            | G2            | G3            | var. hirsuta                     |
| Z5        | Landrace      | China   | C3                            | G2            | G3            | var. vulgaris                    |
| Z6        | Landrace      | China   | C3                            | G2            | G3            | var. hirsuta                     |
| Z7        | Landrace      | China   | C3                            | G2            | G3            | var. hypogaea <sup>1</sup>       |
| Z8        | Landrace      | China   | C3                            | G2            | G3            | var. hypogaea                    |
| Z9        | Landrace      | China   | C2                            | G1            | G1            | var. vulgaris                    |
| Z10       | Landrace      | China   | C3                            | G2            | G3            | var. hypogaea                    |
| Z11       | Breeding Line | China   | C3                            | G2            | G3            | irregular type                   |
| Z12       | Breeding Line | China   | C3                            | G1            | G1            | var. vulgaris                    |
| Z13       | Breeding Line | China   | C3                            | G1            | G1            | var. vulgaris                    |
| Z14       | Breeding Line | China   | C3                            | G2            | G3            | var. vulgaris <sup>1</sup>       |
| Z15       | Breeding Line | China   | C2                            | G1            | G1            | var. vulgaris                    |
| Z16       | Breeding Line | China   | C3                            | G2            | G3            | irregular type                   |
| Z17       | Breeding Line | China   | C3                            | G2            | G3            | var. hirsuta                     |
| Z18       | Breeding Line | China   | C3                            | G2            | G3            | var. hirsuta                     |
| Z19       | Landrace      | China   | C3                            | G2            | G3            | var. hirsuta                     |
| Z20       | Landrace      | China   | C1                            | G1            | G2            | var. fastigiata                  |
| Z21       | Landrace      | China   | C2                            | G1            | G1            | var. vulgaris                    |
| Z22       | Landrace      | China   | C2                            | G1            | G1            | var. vulgaris                    |
| Z23       | Landrace      | China   | C3                            | G2            | G3            | var. hirsuta                     |
| Z24       | Landrace      | China   | C3                            | G2            | G3            | var. hirsuta                     |

|     |               |       |    |    |    |                              |
|-----|---------------|-------|----|----|----|------------------------------|
| Z25 | Landrace      | China | C3 | G2 | G3 | var. hypogaea                |
| Z26 | Landrace      | China | C3 | G2 | G3 | var. hypogaea                |
| Z27 | Landrace      | China | C3 | G2 | G3 | var. hypogaea                |
| Z28 | Landrace      | China | C3 | G2 | G3 | var. hypogaea                |
| Z29 | Landrace      | China | C3 | G2 | G3 | var. hypogaea                |
| Z30 | Landrace      | China | C3 | G2 | G3 | var. hypogaea                |
| Z31 | Landrace      | China | C3 | G2 | G3 | var. hypogaea                |
| Z32 | Landrace      | China | C3 | G2 | G3 | var. hypogaea                |
| Z33 | Landrace      | China | C3 | G2 | G3 | var. hypogaea                |
| Z34 | Landrace      | China | C3 | G2 | G3 | var. hypogaea                |
| Z35 | Landrace      | China | C3 | G2 | G3 | var. hypogaea                |
| Z36 | Landrace      | China | C1 | G1 | G2 | var. fastigiata              |
| Z37 | Landrace      | China | C1 | G1 | G2 | var. fastigiata              |
| Z38 | Landrace      | China | C3 | G2 | G3 | var. vulgaris                |
| Z39 | Breeding Line | China | C3 | G2 | G3 | var. vulgaris                |
| Z40 | Breeding Line | China | C3 | G2 | G3 | irregular type               |
| Z41 | Breeding Line | China | C3 | G2 | G3 | irregular type               |
| Z42 | Breeding Line | China | C3 | G2 | G3 | var. hypogaea                |
| Z43 | Breeding Line | China | C3 | G2 | G3 | var. hypogaea                |
| Z44 | Landrace      | China | C2 | G1 | G1 | var. vulgaris                |
| Z45 | Breeding Line | China | C2 | G1 | G1 | var. vulgaris                |
| Z46 | Breeding Line | China | C2 | G1 | G1 | var. vulgaris                |
| Z48 | Landrace      | China | C3 | G2 | G3 | var. hypogaea <sup>3</sup>   |
| Z49 | Breeding Line | China | C3 | G2 | G3 | var. hypogaea <sup>3</sup>   |
| Z50 | Landrace      | China | C2 | G1 | G1 | var. vulgaris                |
| Z52 | Landrace      | China | C1 | G1 | G2 | var. fastigiata <sup>3</sup> |
| Z54 | Landrace      | China | C1 | G1 | G2 | var. hypogaea                |
| Z55 | Landrace      | China | C1 | G1 | G2 | var. fastigiata <sup>3</sup> |



|     |               |         |    |    |    |                            |
|-----|---------------|---------|----|----|----|----------------------------|
| Z56 | Landrace      | China   | C3 | G2 | G3 | var. hirsuta               |
| Z59 | Breeding Line | China   | C3 | G2 | G3 | var. hypogaea <sup>1</sup> |
| Z60 | Landrace      | China   | C1 | G1 | G2 | var. fastigiata            |
| Z61 | Landrace      | China   | C3 | G2 | G3 | var. hypogaea              |
| Z62 | Landrace      | China   | C3 | G2 | G3 | var. hypogaea              |
| Z63 | Landrace      | China   | C3 | G2 | G3 | var. hypogaea <sup>1</sup> |
| Z64 | Landrace      | China   | C3 | G2 | G3 | var. hypogaea <sup>1</sup> |
| Z65 | Landrace      | China   | C2 | G1 | G1 | var. vulgaris              |
| Z66 | Landrace      | China   | C3 | G2 | G3 | var. vulgaris              |
| Z67 | Landrace      | China   | C2 | G1 | G1 | var. vulgaris              |
| Z68 | Landrace      | China   | C3 | G2 | G3 | var. hypogaea              |
| Z70 | Breeding Line | China   | C2 | G1 | G1 | var. vulgaris              |
| Z71 | Breeding Line | USA     | C2 | G1 | G1 | var. vulgaris              |
| Z72 | Overseas      | India   | C3 | G2 | G3 | var. hypogaea              |
| Z74 | Overseas      | USA     | C2 | G1 | G1 | var. vulgaris              |
| Z75 | Overseas      | USA     | C1 | G1 | G2 | var. fastigiata            |
| Z76 | Overseas      | ND      | C3 | G2 | G3 | var. hypogaea <sup>1</sup> |
| Z78 | Overseas      | ND      | C3 | G2 | G3 | var. hypogaea <sup>1</sup> |
| Z79 | Overseas      | Senegal | C2 | G1 | G1 | var. vulgaris <sup>1</sup> |
| Z80 | Landrace      | Senegal | C2 | G1 | G1 | var. vulgaris              |
| Z81 | Overseas      | Senegal | C3 | G2 | G3 | var. hypogaea <sup>1</sup> |
| Z83 | Breeding Line | China   | C2 | G1 | G1 | var. vulgaris              |
| Z84 | Breeding Line | China   | C2 | G1 | G1 | var. vulgaris              |
| Z85 | Breeding Line | China   | C3 | G2 | G3 | var. vulgaris              |
| Z86 | Landrace      | China   | C2 | G1 | G1 | var. fastigiata            |
| Z87 | Breeding Line | China   | C3 | G2 | G3 | var. hypogaea <sup>1</sup> |
| Z88 | Breeding Line | China   | C3 | G2 | G3 | irregular type             |

|      |               |       |    |    |    |                            |
|------|---------------|-------|----|----|----|----------------------------|
| Z89  | Landrace      | China | C2 | G1 | G1 | var. vulgaris              |
| Z90  | Breeding Line | China | C3 | G2 | G3 | irregular type             |
| Z91  | Breeding Line | China | C3 | G2 | G3 | var. vulgaris              |
| Z92  | Breeding Line | China | C3 | G2 | G3 | var. hypogaea              |
| Z93  | Breeding Line | China | C3 | G2 | G3 | irregular type             |
| Z94  | Breeding Line | China | C2 | G1 | G1 | var. vulgaris <sup>1</sup> |
| Z95  | Breeding Line | China | C3 | G2 | G3 | irregular type             |
| Z96  | Breeding Line | China | C2 | G1 | G1 | var. vulgaris              |
| Z97  | Breeding Line | China | C2 | G1 | G1 | var. vulgaris              |
| Z102 | Breeding Line | China | C3 | G2 | G3 | var. hypogaea <sup>1</sup> |
| Z103 | Breeding Line | China | C2 | G1 | G1 | var. vulgaris              |
| Z107 | Breeding Line | China | C3 | G2 | G3 | var. hypogaea <sup>1</sup> |
| Z109 | Breeding Line | China | C2 | G1 | G1 | var. vulgaris <sup>1</sup> |
| Z110 | Breeding Line | China | C3 | G2 | G3 | var. hypogaea              |
| Z111 | Breeding Line | China | C2 | G1 | G1 | var. vulgaris              |
| Z112 | Breeding Line | China | C3 | G1 | G1 | var. vulgaris <sup>1</sup> |
| Z114 | Breeding Line | China | C3 | G2 | G3 | var. hypogaea <sup>1</sup> |
| Z115 | Breeding Line | China | C3 | G2 | G3 | var. hypogaea <sup>1</sup> |
| Z116 | Breeding Line | China | C3 | G2 | G3 | var. hypogaea              |
| Z117 | Breeding Line | China | C3 | G2 | G3 | var. hypogaea              |
| Z118 | Breeding Line | China | C3 | G2 | G3 | var. vulgaris              |
| Z119 | Breeding Line | China | C3 | G2 | G3 | var. hypogaea              |
| Z120 | Landrace      | China | C2 | G1 | G1 | var. vulgaris              |
| Z121 | Breeding Line | China | C2 | G1 | G1 | var. vulgaris              |
| Z122 | Breeding Line | China | C3 | G2 | G3 | var. hypogaea <sup>1</sup> |
| Z123 | Landrace      | China | C2 | G1 | G1 | var. vulgaris              |
| Z124 | Breeding Line | China | C3 | G2 | G3 | var. hypogaea              |

|      |               |       |    |    |    |                            |
|------|---------------|-------|----|----|----|----------------------------|
| Z125 | Breeding Line | China | C2 | G1 | G1 | var. vulgaris              |
| Z127 | Breeding Line | China | C2 | G1 | G1 | var. vulgaris              |
| Z129 | Breeding Line | China | C3 | G2 | G3 | var. hypogaea <sup>1</sup> |
| Z130 | Breeding Line | China | C2 | G1 | G1 | var. vulgaris <sup>1</sup> |
| Z132 | Breeding Line | China | C2 | G1 | G1 | var. vulgaris <sup>1</sup> |
| Z133 | Landrace      | China | C2 | G1 | G1 | var. vulgaris              |
| Z134 | Breeding Line | China | C3 | G2 | G3 | irregular type             |
| Z136 | Breeding Line | China | C2 | G1 | G1 | var. vulgaris <sup>1</sup> |
| Z138 | Breeding Line | China | C2 | G1 | G1 | var. vulgaris              |
| Z139 | Breeding Line | China | C3 | G2 | G3 | var. hypogaea              |
| Z140 | Breeding Line | China | C2 | G1 | G1 | var. vulgaris              |
| Z141 | Breeding Line | China | C2 | G1 | G1 | var. vulgaris              |
| Z142 | Breeding Line | China | C3 | G2 | G3 | var. hypogaea              |
| Z143 | Breeding Line | China | C2 | G1 | G1 | var. vulgaris              |
| Z144 | Breeding Line | China | C2 | G1 | G1 | var. vulgaris              |
| Z146 | Breeding Line | China | C2 | G1 | G1 | var. vulgaris              |
| Z147 | Breeding Line | China | C3 | G2 | G3 | var. hypogaea              |
| Z148 | Landrace      | China | C2 | G1 | G1 | var. vulgaris <sup>2</sup> |
| Z149 | Breeding Line | China | C3 | G2 | G3 | var. hypogaea              |
| Z152 | Breeding Line | China | C1 | G1 | G2 | var. fastigiata            |
| Z153 | Breeding Line | China | C3 | G2 | G3 | var. vulgaris              |
| Z154 | Breeding Line | China | C2 | G1 | G1 | var. vulgaris              |
| Z155 | Breeding Line | China | C3 | G2 | G3 | var. hypogaea              |
| Z156 | Landrace      | China | C2 | G1 | G1 | var. vulgaris              |
| Z158 | Breeding Line | China | C3 | G2 | G3 | var. vulgaris              |
| Z161 | Landrace      | China | C2 | G1 | G1 | var. vulgaris              |
| Z162 | Breeding Line | China | C2 | G1 | G1 | var. vulgaris <sup>1</sup> |
| Z163 | Breeding Line | China | C3 | G2 | G3 | var. hypogaea              |

|      |               |            |    |    |    |                              |
|------|---------------|------------|----|----|----|------------------------------|
| Z164 | Breeding Line | China      | C3 | G1 | G1 | var. hypogaea <sup>1</sup>   |
| Z165 | Breeding Line | China      | C3 | G2 | G3 | var. vulgaris                |
| Z166 | Breeding Line | China      | C3 | G2 | G3 | var. hypogaea <sup>1</sup>   |
| Z167 | Breeding Line | China      | C3 | G2 | G3 | irregular type               |
| Z168 | Landrace      | China      | C3 | G2 | G3 | var. hypogaea                |
| Z170 | Breeding Line | China      | C3 | G2 | G3 | var. hypogaea <sup>1</sup>   |
| Z171 | Breeding Line | China      | C3 | G2 | G3 | var. hypogaea <sup>1</sup>   |
| Z172 | Breeding Line | China      | C3 | G2 | G3 | var. hypogaea <sup>1</sup>   |
| Z173 | Breeding Line | China      | C2 | G1 | G1 | var. vulgaris <sup>1</sup>   |
| Z174 | Breeding Line | China      | C2 | G1 | G1 | var. vulgaris <sup>1</sup>   |
| Z175 | Breeding Line | China      | C2 | G1 | G1 | var. vulgaris                |
| Z176 | Breeding Line | China      | C3 | G2 | G3 | var. hypogaea <sup>1</sup>   |
| Z177 | Breeding Line | China      | C3 | G2 | G3 | var. hypogaea                |
| Z180 | Breeding Line | China      | C2 | G1 | G1 | var. vulgaris                |
| Z181 | Breeding Line | China      | C2 | G1 | G1 | var. vulgaris                |
| Z182 | Landrace      | China      | C3 | G2 | G3 | var. hypogaea                |
| Z184 | Breeding Line | China      | C2 | G1 | G1 | var. vulgaris                |
| Z185 | Overseas      | Mozambique | C2 | G1 | G1 | var. hypogaea                |
| Z186 | Overseas      | Nigeria    | C3 | G2 | G3 | var. vulgaris                |
| Z187 | Overseas      | Zimbabwe   | C3 | G2 | G3 | var. vulgaris <sup>2</sup>   |
| Z188 | Overseas      | Zimbabwe   | C2 | G1 | G1 | var. fastigiata              |
| Z190 | Overseas      | Brazil     | C1 | G1 | G2 | var. fastigiata              |
| Z191 | Overseas      | Paraguay   | C3 | G2 | G3 | var. hypogaea <sup>3</sup>   |
| Z192 | Overseas      | Paraguay   | C1 | G1 | G2 | var. fastigiata              |
| Z193 | Overseas      | Paraguay   | C1 | G1 | G2 | var. fastigiata              |
| Z194 | Overseas      | Paraguay   | C1 | G1 | G1 | var. fastigiata <sup>2</sup> |
| Z195 | Overseas      | Paraguay   | C1 | G1 | G1 | var. vulgaris <sup>2</sup>   |

|      |          |              |    |    |    |                              |
|------|----------|--------------|----|----|----|------------------------------|
| Z196 | Overseas | Brazil       | C1 | G1 | G2 | var. fastigiata              |
| Z197 | Overseas | Burkina Faso | C2 | G1 | G1 | var. hypogaea                |
| Z198 | Overseas | Argentina    | C1 | G1 | G2 | var. fastigiata <sup>1</sup> |
| Z199 | Overseas | India        | C3 | G2 | G3 | var. hypogaea                |
| Z200 | Overseas | India        | C3 | G2 | G3 | var. hypogaea                |
| Z201 | Overseas | Israel       | C3 | G2 | G2 | var. hypogaea <sup>1</sup>   |
| Z202 | Overseas | Madagascar   | C3 | G2 | G3 | var. hypogaea                |
| Z203 | Overseas | Malawi       | C3 | G2 | G3 | var. hypogaea                |
| Z204 | Overseas | Mexico       | C3 | G2 | G3 | var. hypogaea                |
| Z205 | Overseas | Nigeria      | C3 | G2 | G3 | var. hypogaea                |
| Z206 | Overseas | Nigeria      | C3 | G2 | G3 | var. hypogaea                |
| Z207 | Overseas | Paraguay     | C3 | G2 | G3 | var. hypogaea                |
| Z208 | Overseas | Senegal      | C3 | G2 | G3 | var. hypogaea <sup>3</sup>   |
| Z209 | Overseas | South Africa | C2 | G1 | G1 | var. vulgaris <sup>1</sup>   |
| Z210 | Overseas | South Africa | C2 | G1 | G1 | var. vulgaris <sup>1</sup>   |
| Z212 | Overseas | Taiwan       | C3 | G2 | G3 | var. hirsuta <sup>1</sup>    |
| Z213 | Overseas | Uruguay      | C2 | G1 | G1 | var. vulgaris <sup>2</sup>   |
| Z214 | Overseas | Uruguay      | C2 | G1 | G1 | var. vulgaris <sup>2</sup>   |
| Z215 | Overseas | Brazil       | C1 | G1 | G2 | var. fastigiata              |
| Z216 | Overseas | Brazil       | C2 | G1 | G1 | var. fastigiata              |
| Z218 | Overseas | Zambia       | C1 | G1 | G1 | var. vulgaris                |
| Z219 | Overseas | Cuba         | C3 | G2 | G3 | var. hypogaea                |
| Z220 | Overseas | India        | C2 | G1 | G1 | var. vulgaris <sup>1</sup>   |
| Z221 | Overseas | Israel       | C3 | G2 | G3 | var. hypogaea <sup>1</sup>   |
| Z222 | Overseas | Venezuela    | C2 | G1 | G1 | var. hypogaea                |
| Z223 | Overseas | Zambia       | C3 | G2 | G3 | var. vulgaris <sup>1</sup>   |
| Z224 | Overseas | Argentina    | C1 | G1 | G2 | var. fastigiata <sup>2</sup> |

|      |          |              |    |    |    |                              |
|------|----------|--------------|----|----|----|------------------------------|
| Z225 | Overseas | Uruguay      | C2 | G1 | G1 | var. vulgaris <sup>2</sup>   |
| Z226 | Overseas | China        | C3 | G2 | G3 | var. hypogaea                |
| Z227 | Overseas | China        | C3 | G2 | G3 | var. vulgaris <sup>2</sup>   |
| Z228 | Overseas | Sudan        | C3 | G2 | G3 | var. hypogaea                |
| Z229 | Overseas | Ivory Coast  | C3 | G2 | G3 | var. hypogaea                |
| Z230 | Overseas | Japan        | C2 | G1 | G1 | var. vulgaris                |
| Z231 | Overseas | South Africa | C2 | G1 | G1 | var. vulgaris <sup>2</sup>   |
| Z232 | Overseas | Cuba         | C1 | G1 | G2 | var. fastigiata              |
| Z236 | Overseas | Zambia       | C2 | G1 | G1 | var. vulgaris <sup>1</sup>   |
| Z237 | Overseas | Zambia       | C2 | G1 | G1 | var. vulgaris <sup>2</sup>   |
| Z238 | Overseas | India        | C1 | G1 | G1 | var. fastigiata <sup>2</sup> |
| Z239 | Overseas | India        | C3 | G2 | G3 | var. hypogaea                |
| Z240 | Overseas | Argentina    | C3 | G2 | G3 | var. hypogaea                |
| Z241 | Overseas | South Africa | C3 | G2 | G3 | var. hypogaea                |
| Z242 | Overseas | Israel       | C3 | G2 | G3 | var. hypogaea                |
| Z245 | Overseas | Israel       | C3 | G2 | G3 | var. hypogaea                |
| Z246 | Overseas | Pakistan     | C3 | G2 | G3 | var. hypogaea                |
| Z247 | Overseas | Morocco      | C2 | G1 | G1 | var. hypogaea                |
| Z248 | Overseas | Argentina    | C1 | G1 | G2 | var. fastigiata              |
| Z249 | Overseas | Israel       | C3 | G2 | G3 | var. hypogaea                |
| Z250 | Overseas | Mexico       | C3 | G2 | G3 | var. hypogaea                |
| Z251 | Overseas | Argentina    | C1 | G1 | G2 | var. fastigiata              |
| Z254 | Overseas | Israel       | C3 | G2 | G3 | var. hypogaea <sup>1</sup>   |
| Z255 | Overseas | Thailand     | C1 | G1 | G2 | var. fastigiata <sup>2</sup> |
| Z257 | Overseas | China        | C3 | G2 | G3 | var. vulgaris                |
| Z258 | Overseas | ND           | C1 | G1 | G2 | var. fastigiata <sup>1</sup> |
| Z259 | Overseas | Bolivia      | C1 | G1 | G2 | var. fastigiata <sup>2</sup> |

|      |          |              |    |    |    |                              |
|------|----------|--------------|----|----|----|------------------------------|
| Z260 | Overseas | Nigeria      | C3 | G2 | G3 | var. hypogaea                |
| Z261 | Overseas | India        | C2 | G1 | G1 | var. vulgaris                |
| Z262 | Overseas | Zimbabwe     | C2 | G1 | G1 | var. vulgaris <sup>2</sup>   |
| Z263 | Overseas | Zimbabwe     | C1 | G1 | G1 | var. fastigiata              |
| Z264 | Overseas | Paraguay     | C1 | G1 | G2 | var. fastigiata <sup>1</sup> |
| Z265 | Overseas | ND           | C1 | G1 | G2 | var. fastigiata <sup>1</sup> |
| Z266 | Overseas | Paraguay     | C1 | G1 | G1 | var. fastigiata              |
| Z267 | Overseas | Brazil       | C2 | G1 | G1 | var. vulgaris <sup>2</sup>   |
| Z268 | Overseas | Burkina Faso | C3 | G2 | G3 | var. hypogaea                |
| Z269 | Overseas | Bolivia      | C3 | G2 | G3 | var. hypogaea <sup>1</sup>   |
| Z270 | Overseas | Bolivia      | C3 | G2 | G3 | var. hypogaea <sup>1</sup>   |
| Z272 | Overseas | Colombia     | C2 | G1 | G1 | var. vulgaris                |
| Z273 | Landrace | China        | C3 | G2 | G3 | var. hypogaea                |
| Z275 | Landrace | China        | C3 | G2 | G3 | var. hypogaea                |
| Z280 | Landrace | China        | C3 | G2 | G3 | var. hypogaea                |
| Z281 | Landrace | China        | C3 | G2 | G3 | var. hirsuta                 |
| Z282 | Landrace | China        | C3 | G2 | G3 | var. hypogaea                |
| Z283 | Landrace | China        | C3 | G2 | G3 | var. hypogaea                |
| Z284 | Landrace | China        | C1 | G1 | G1 | var. fastigiata              |
| Z285 | Landrace | China        | C3 | G2 | G3 | var. hypogaea <sup>1</sup>   |
| Z287 | Landrace | China        | C3 | G2 | G3 | var. hypogaea <sup>1</sup>   |
| Z288 | Landrace | China        | C3 | G2 | G3 | var. hypogaea <sup>1</sup>   |
| Z291 | Landrace | China        | C3 | G2 | G3 | var. hypogaea <sup>1</sup>   |
| Z292 | Landrace | China        | C3 | G2 | G3 | var. hirsuta <sup>2</sup>    |
| Z294 | Landrace | China        | C3 | G2 | G3 | var. hypogaea                |
| Z299 | Landrace | China        | C3 | G2 | G3 | var. hypogaea                |
| Z300 | Landrace | China        | C3 | G2 | G3 | var. hypogaea                |

|      |               |       |    |    |    |                            |
|------|---------------|-------|----|----|----|----------------------------|
| Z306 | Landrace      | China | C3 | G2 | G3 | var. hypogaea              |
| Z309 | Landrace      | China | C3 | G2 | G3 | var. hypogaea              |
| Z319 | Landrace      | China | C3 | G2 | G3 | var. hypogaea              |
| Z323 | Landrace      | China | C3 | G2 | G3 | var. hypogaea <sup>1</sup> |
| Z324 | Landrace      | China | C3 | G2 | G3 | var. hirsuta               |
| Z326 | Landrace      | China | C3 | G2 | G3 | var. hypogaea              |
| Z329 | Landrace      | China | C3 | G2 | G3 | var. hypogaea <sup>1</sup> |
| Z330 | Landrace      | China | C2 | G1 | G1 | var. vulgaris <sup>1</sup> |
| Z331 | Landrace      | China | C3 | G2 | G3 | var. hypogaea <sup>1</sup> |
| Z332 | Landrace      | China | C2 | G1 | G1 | var. vulgaris <sup>1</sup> |
| Z333 | Landrace      | China | C3 | G2 | G3 | var. hirsuta               |
| Z338 | Landrace      | China | C3 | G2 | G3 | var. hypogaea              |
| Z345 | Landrace      | China | C3 | G2 | G3 | var. hypogaea              |
| Z346 | Landrace      | China | C3 | G2 | G3 | var. hirsuta               |
| Z350 | Landrace      | China | C3 | G2 | G3 | var. hypogaea              |
| Z358 | Landrace      | China | C3 | G2 | G3 | var. hypogaea              |
| Z373 | Landrace      | China | C3 | G2 | G3 | var. hirsuta               |
| Z376 | Landrace      | China | C2 | G1 | G1 | var. hypogaea              |
| Z377 | Breeding Line | China | C3 | G1 | G1 | var. vulgaris              |
| Z379 | Breeding Line | China | C3 | G2 | G3 | var. hypogaea <sup>1</sup> |
| Z382 | Breeding Line | China | C3 | G2 | G3 | var. hypogaea              |
| Z383 | Breeding Line | China | C2 | G2 | G3 | var. vulgaris              |
| Z384 | Breeding Line | China | C3 | G2 | G3 | irregular type             |
| Z385 | Breeding Line | China | C3 | G2 | G3 | var. hypogaea              |
| Z388 | Breeding Line | China | C3 | G2 | G3 | var. hypogaea              |
| Z389 | Breeding Line | China | C3 | G2 | G3 | var. vulgaris              |
| Z390 | Breeding Line | China | C3 | G2 | G3 | var. hypogaea              |
| Z391 | Breeding Line | China | C3 | G2 | G3 | var. hypogaea              |



|      |               |       |    |    |    |                            |
|------|---------------|-------|----|----|----|----------------------------|
| Z396 | Breeding Line | China | C3 | G2 | G3 | var. hypogaea <sup>1</sup> |
| Z399 | Breeding Line | China | C3 | G2 | G3 | var. hypogaea              |
| Z402 | Breeding Line | China | C3 | G2 | G3 | var. hypogaea <sup>1</sup> |
| Z404 | Breeding Line | China | C3 | G1 | G1 | var. vulgaris              |
| Z405 | Breeding Line | China | C3 | G2 | G3 | var. hypogaea              |
| Z406 | Breeding Line | China | C3 | G2 | G3 | var. hypogaea              |
| Z409 | Breeding Line | China | C3 | G2 | G3 | var. hypogaea              |
| Z411 | Breeding Line | China | C3 | G2 | G3 | var. hypogaea <sup>1</sup> |
| Z421 | Breeding Line | China | C3 | G2 | G3 | var. hypogaea              |
| Z422 | Breeding Line | China | C3 | G2 | G3 | var. hypogaea              |
| Z423 | Breeding Line | China | C3 | G2 | G3 | var. hypogaea <sup>1</sup> |
| Z424 | Breeding Line | China | C3 | G2 | G3 | var. hypogaea              |
| Z425 | Breeding Line | China | C3 | G2 | G3 | var. vulgaris              |
| Z433 | Breeding Line | China | C3 | G2 | G3 | var. hypogaea              |
| Z435 | Breeding Line | China | C3 | G2 | G3 | var. hypogaea              |
| Z436 | Breeding Line | China | C3 | G2 | G3 | var. hypogaea              |
| Z440 | Breeding Line | China | C3 | G2 | G3 | var. vulgaris              |
| Z445 | Breeding Line | China | C3 | G2 | G3 | var. vulgaris              |
| Z446 | Breeding Line | China | C3 | G2 | G3 | var. hypogaea              |
| Z448 | Breeding Line | China | C3 | G2 | G3 | var. vulgaris              |
| Z680 | Breeding Line | China | C3 | G2 | G3 | irregular type             |
| Z681 | Breeding Line | China | C3 | G2 | G3 | var. hypogaea <sup>1</sup> |
| Z685 | Breeding Line | China | C3 | G2 | G3 | var. hypogaea <sup>1</sup> |
| Z687 | Breeding Line | China | C3 | G2 | G3 | irregular type             |
| Z689 | Breeding Line | China | C2 | G1 | G1 | var. vulgaris              |
| Z693 | Breeding Line | China | C3 | G2 | G3 | irregular type             |
| Z695 | Breeding Line | China | C3 | G2 | G3 | var. hypogaea              |
| Z696 | Breeding Line | China | C3 | G2 | G3 | var. hypogaea              |

|      |               |          |    |    |    |                              |
|------|---------------|----------|----|----|----|------------------------------|
| Z839 | Overseas      | Japan    | C3 | G2 | G3 | var. hypogaea                |
| Z840 | Landrace      | China    | C2 | G1 | G1 | var. vulgaris                |
| Z847 | Breeding Line | China    | C3 | G1 | G1 | var. vulgaris                |
| Z851 | Breeding Line | China    | C3 | G2 | G3 | var. hypogaea                |
| Z871 | Breeding Line | China    | C3 | G2 | G3 | var. hypogaea                |
| Z872 | Landrace      | China    | C3 | G2 | G3 | var. hirsuta <sup>1</sup>    |
| Z873 | Breeding Line | China    | C3 | G2 | G3 | var. vulgaris                |
| Z884 | Breeding Line | China    | C3 | G2 | G3 | var. hypogaea                |
| Z885 | Breeding Line | China    | C2 | G1 | G1 | var. vulgaris                |
| Z899 | Breeding Line | China    | C3 | G2 | G3 | var. hypogaea                |
| Z901 | Landrace      | China    | C3 | G2 | G3 | var. hirsuta                 |
| Z904 | Landrace      | China    | C3 | G2 | G3 | var. hypogaea                |
| Z905 | Overseas      | Pakistan | C3 | G2 | G3 | var. hirsuta <sup>1</sup>    |
| Z906 | Overseas      | ND       | C1 | G1 | G2 | var. fastigiata <sup>1</sup> |
| Z907 | Breeding Line | China    | C3 | G2 | G3 | var. hypogaea                |
| Z908 | Landrace      | China    | C3 | G2 | G3 | var. vulgaris                |
| Z909 | Overseas      | USA      | C3 | G2 | G3 | var. hirsuta <sup>3</sup>    |
| Z912 | Landrace      | China    | C2 | G1 | G1 | var. vulgaris <sup>1</sup>   |
| Z915 | Landrace      | China    | C3 | G2 | G3 | var. hirsuta                 |
| Z916 | Landrace      | China    | C3 | G2 | G3 | var. hypogaea <sup>1</sup>   |
| Z921 | Landrace      | China    | C2 | G1 | G1 | var. vulgaris                |

<sup>1</sup> Not defined; <sup>2</sup> Within subspecies; <sup>3</sup> Between subspecies
